# Supplementary material
Source: publisher figshare collection journal article supplement (https://rs.figshare.com/ndownloader/files/13512095)
Supplement: Supplementary file 1 [file 13512095]

**Table S2.** Environmental variables used in this study to investigate the most important drivers of the spatio-temporal patterns of water salinity and the most important drivers of salinisation. The correlation among variables (Spearman’s rank correlation coefficient > |0.7|) and the final set of variables used to perform the Random Forest and Generalized Linear Model analyses and the Generalized Linear Mixed-effect Model analyses is also shown.

| **Type and source** | **Code** | **Definition** | **Units** | **Correlated with:**  **(Spatial analysis)** | **Correlated with:**  **(Temporal analysis)** |
| --- | --- | --- | --- | --- | --- |
| **Topographic**  DEM (IGN; 5 m) | AREA1, 2 | Total catchment area | km2 | ACW | ACW |
| ELE1 | River reach elevation | m | ToOUT | ToOUT |
| ACW | Active channel width | m | AREA | AREA |
| VWI1, 2 | Valley Width Index |  |  |  |
| ToOUT2 | Distance from river reach to river mouth | m | ELE | ELE |
| SINUOSITY1 | River reach sinuosity |  |  |  |
| **Climatic**  SIMPA | MN_TEM | Mean annual temperature in the draining catchment | ºC | LC_TEM | - |
| LC_TEM1 | Mean annual temperature within the adjacent hillslopes | ºC | MN_TEM, MN_EP | - |
| MN_PRE1 | Mean annual precipitation in the draining catchment | mm | LC_PRE | - |
| LC_PRE | Mean annual precipitation within the adjacent hillslopes | mm | MN_PRE, LC_EI | - |
| MN_EP | Mean annual potential evapotranspiration in the draining catchment | mm | LC_TEM, LC_EP | - |
| LC_EP1 | Mean annual potential evapotranspiration within the adjacent hillslopes | mm | MN_EP | - |
| MN_EI | Mean annual catchment evapotranspiration | mm | LC_EI | - |
| LC_EI1 | Mean annual evapotranspiration within the adjacent hillslopes | mm | LC_PRE, MN_EI | - |
| **Land uses**  SIOSE | MN_UHD1, 2 | Area occupied by urban areas in the draining catchment | Parts per unit (º/1) |  |  |
| LC_UHD1 | Area occupied by urban areas within the adjacent hillslopes | Parts per unit (º/1) |  |  |
| MN_AGR1, 2 | Area occupied by agricultural land in the draining catchment | Parts per unit (º/1) | LC_AGR | MN_BLF, MN_SSH |
| LC_AGR2 | Area occupied by agricultural land within the adjacent hillslopes | Parts per unit (º/1) | MN_AGR |  |
| MN_PAS1, 2 | Area occupied by pasture in the draining catchment | Parts per unit (º/1) |  |  |
| LC_PAS1 | Area occupied by pasture within the adjacent hillslopes | Parts per unit (º/1) |  |  |
| MN_BLF1 | Area occupied by broadleaf forest in the draining catchment | Parts per unit (º/1) |  | MN_AGR |
| LC_BLF1, 2 | Area occupied by broadleaf forest within the adjacent hillslopes | Parts per unit (º/1) |  |  |
| MN_CNF1, 2 | Area occupied by coniferous forest in the draining catchment | Parts per unit (º/1) |  |  |
| LC_CNF1, 2 | Area occupied by coniferous forest within the adjacent hillslopes | Parts per unit (º/1) |  |  |
| MN_PLT1, 2 | Area occupied by plantations in the draining catchment | Parts per unit (º/1) |  |  |
| LC_PLT1, 2 | Area occupied by plantations within the adjacent hillslopes | Parts per unit (º/1) |  |  |
| MN_SSH1 | Area occupied by moors, heathland, scrub and shrubs in the draining catchment | Parts per unit (º/1) |  | MN_AGR |
| LC_SSH1, 2 | Area occupied moors, heathland, scrub and shrubs within the adjacent hillslopes | Parts per unit (º/1) |  |  |
| **Geologic**  IGME | MN_calc | Area occupied by calcareous rocks in the draining catchment | Parts per unit (º/1) | MN_PER, MN_CON, LC_CON | MN_PER, MN_CON |
| LC_calc1, 2 | Area occupied by calcareous rocks within the adjacent hillslopes | Parts per unit (º/1) |  |  |
| MN_cong | Area occupied by conglomerate rocks in the draining catchment | Parts per unit (º/1) | MN_HAR | MN_HAR |
| LC_cong1, 2 | Area occupied by conglomerate rocks within the adjacent hillslopes | Parts per unit (º/1) |  |  |
| MN_sdim1, 2 | Area occupied by sedimentary rocks in the draining catchment | Parts per unit (º/1) | LC_sdim |  |
| LC_sdim2 | Area occupied by sedimentary rocks within the adjacent hillslopes | Parts per unit (º/1) | MN_sdim | LC_HAR |
| MN_slic1, 2 | Area occupied by siliceous rocks in the draining catchment | Parts per unit (º/1) |  |  |
| LC_slic1, 2 | Area occupied by siliceous rocks within the adjacent hillslopes | Parts per unit (º/1) |  |  |
| MN_HAR1, 2 | Average rock hardness in the draining catchment | 1-5 | MN_cong | MN_cong |
| LC_HAR1 | Average rock hardness within the adjacent hillslopes | 1-5 |  | LC_sdim |
| MN_CON1, 2 | Average rock conductivity in the draining catchment | 1-5 | MN_calc, MN_PER, LC_CON | MN_calc, MN_PER |
| LC_CON2 | Average rock conductivity within the adjacent hillslopes | 1-5 | MN_calc, MN_CON |  |
| MN_PER | Average rock permeability in the draining catchment | 1-5 | MN_calc, MN_CON | MN_calc, MN_CON |
| LC_PER1, 2 | Average rock permeability within the adjacent hillslopes | 1-5 |  |  |
| **Anthropic pressures**  Hydrographic confederations and water agencies | A_DAR1, 2 | Distance to the nearest weir upstream. Limitation of 5000 m. | m |  |  |
| P_DAR1 | Distance to the nearest dam upstream. Limitation of 5000 m. | m |  |  |
| V_DAR1, 2 | Distance to the nearest effluent discharge upstream. Limitation of 5000 m. | m |  |  |
| **Temporal**  SAICA network | WL | Daily average water level | m | - | WL_Max5, WL_Max10, WL_Max20, WL_Max40, WL_Min5, WL_Min10, WL_Min20, WL_Min40 |
| WL_Max5 | Maximum water level for the 5 previous days | m | - | WL, WL_Max10, WL_Max20, WL_Max40, WL_Min5, WL_Min10, WL_Min20, WL_Min40 |
| WL_Max10 | Maximum water level for the 10 previous days | m | - | WL, WL_Max5, WL_Max20, WL_Max40, WL_Min5, WL_Min10, WL_Min20, WL_Min40, WL_SD10 |
| WL_Max20 | Maximum water level for the 20 previous days | m | - | WL, WL_Max5, WL_Max10, WL_Max40, WL_Min5, WL_Min10, WL_Min20, WL_Min40, WL_SD20 |
| WL_Max40 | Maximum water level for the 40 previous days | m | - | WL, WL_Max5, WL_Max10, WL_Max20, WL_Min5, WL_Min10, WL_Min20, WL_Min40, WL_SD40 |
| WL_Min5 | Minimum water level for the 5 previous days | m | - | WL, WL_Max5, WL_Max10, WL_Max20, WL_Max40, WL_Min10, WL_Min20, WL_Min40 |
| WL_Min10 | Minimum water level for the 10 previous days | m | - | WL, WL_Max5, WL_Max10, WL_Max20, WL_Max40, WL_Min5, WL_Min20, WL_Min40 |
| WL_Min20 | Minimum water level for the 20 previous days | m | - | WL, WL_Max5, WL_Max10, WL_Max20, WL_Max40, WL_Min5, WL_Min10, WL_Min40 |
| WL_Min402 | Minimum water level for the 40 previous days | m | - | WL, WL_Max5, WL_Max10, WL_Max20, WL_Max40, WL_Min5, WL_Min10, WL_Min20 |
| WL_SD52 | Water level standard deviation for the 5 previous days | m | - | WL_CV5, WL_SD10, WL_SD20, WL_SD40 |
| WL_SD10 | Water level standard deviation for the 10 previous days | m | - | WL_CV10, WL_SD5, WL_SD20, WL_SD40, WL_Max10 |
| WL_SD20 | Water level standard deviation for the 20 previous days | m | - | WL_CV20, WL_SD5, WL_SD10, WL_SD40, WL_Max20 |
| WL_SD40 | Water level standard deviation for the 40 previous days | m | - | WL_SD5, WL_SD10, WL_SD20, WL_Max40 |
| WL_CV5 | Water level coefficient of variation for the 5 previous days | m | - | WL_CV10, WL_CV20, WL_CV40, WL_SD5 |
| WL_CV102 | Water level coefficient of variation for the 10 previous days | m | - | WL_CV5, WL_CV20, WL_CV40, WL_SD10 |
| WL_CV20 | Water level coefficient of variation for the 20 previous days | m | - | WL_CV5, WL_CV10, WL_CV40, WL_SD20 |
| WL_CV40 | Water level coefficient of variation for the 40 previous days | m | - | WL_CV5, WL_CV10, WL_CV20 |
| T2 | Daily average water temperature | ºC | - |  |
| T_Max5 | Maximum water temperature for the 5 previous days | ºC | - | T_Max10, T_Max20 |
| T_Max10 | Maximum water temperature for the 10 previous days | ºC | - | T_SD10, T_Max5, T_Max20 |
| T_Max20 | Maximum water temperature for the 20 previous days | ºC | - | T_SD20, T_Max5, T_Max10 |
| T_Max402 | Maximum water temperature for the 40 previous days | ºC | - | T_SD40 |
| T_Min52 | Minimum water temperature for the 5 previous days | ºC | - | T_Min10, T_Min20 |
| T_Min10 | Minimum water temperature for the 10 previous days | ºC | - | T_CV40, T_Min5, T_Min20, T_Min40 |
| T_Min20 | Minimum water temperature for the 20 previous days | ºC | - | T_CV40, T_Min5, T_Min10, T_Min40 |
| T_Min40 | Minimum water temperature for the 40 previous days | ºC | - | T_CV40, T_Min10, T_Min20 |
| T_SD5 | Water temperature standard deviation for the 5 previous days | ºC | - | T_CV5 |
| T_SD102 | Water temperature standard deviation for the 10 previous days | ºC | - | T_CV10, T_CV20, T_SD20, T_Max10 |
| T_SD20 | Water temperature standard deviation for the 20 previous days | ºC | - | T_CV20, T_SD10, T_SD40, T_Max20 |
| T_SD40 | Water temperature standard deviation for the 40 previous days | ºC | - | T_CV40, T_SD20, T_Max40 |
| T_CV5 | Water temperature coefficient of variation for the 5 previous days | ºC | - | T_SD5 |
| T_CV10 | Water temperature coefficient of variation for the 10 previous days | ºC | - | T_CV20, T_SD10 |
| T_CV20 | Water temperature coefficient of variation for the 20 previous days | ºC | - | T_CV10, T_CV40, T_SD10, T_SD20, |
| T_CV40 | Water temperature coefficient of variation for the 40 previous days | ºC | - | T_CV20, T_SD40, T_Min10, T_Min20, T_Min40 |
| pH2 | Daily average pH |  | - | pH_Max5, pH_Max10, pH_Max20, pH_Min5, pH_Min10, pH_Min20, pH_Min40 |
| pH_Max5 | Maximum pH for the 5 previous days |  | - | pH, pH_Max10, pH_Max20, pH_Max40, pH_Min5 |
| pH_Max10 | Maximum pH for the 10 previous days |  | - | pH, pH_Max5, pH_Max20, pH_Max40 |
| pH_Max20 | Maximum pH for the 20 previous days |  | - | pH, pH_Max5, pH_Max10, pH_Max40 |
| pH_Max40 | Maximum pH for the 40 previous days |  | - | pH_Max5, pH_Max10, pH_Max20 |
| pH_Min5 | Minimum pH for the 5 previous days |  | - | pH, pH_Max5, pH_Min10, pH_Min20, pH_Min40 |
| pH_Min10 | Minimum pH for the 10 previous days |  | - | pH, pH_Min5, pH_Min20, pH_Min40 |
| pH_Min20 | Minimum pH for the 20 previous days |  | - | pH, pH_Min5, pH_Min10, pH_Min40 |
| pH_Min40 | Minimum pH for the 40 previous days |  | - | pH, pH_Min5, pH_Min10, pH_Min20 |
| pH_SD5 | pH standard deviation for the 5 previous days |  | - | pH_CV5, pH_CV10, pH_CV20, pH_SD10, pH_20 |
| pH_SD10 | pH standard deviation for the 10 previous days |  | - | pH_CV5, pH_CV10, pH_CV20, pH_CV40, pH_SD5, pH_SD20, pH_SD40 |
| pH_SD20 | pH standard deviation for the 20 previous days |  | - | pH_CV5, pH_CV10, pH_CV20, pH_CV40, pH_SD5, pH_SD10, pH_SD40 |
| pH_SD40 | pH standard deviation for the 40 previous days |  | - | pH_CV10, pH_CV20, pH_CV40, pH_SD10, pH_SD20 |
| pH_CV5 | pH coefficient of variation for the 5 previous days |  | - | pH_CV10, pH_CV20, pH_SD5, pH_SD10, pH_SD20 |
| pH_CV10 | pH coefficient of variation for the 10 previous days |  | - | pH_CV5, pH_CV20, pH_CV40, pH_SD5, pH_SD10, pH_SD20, pH_SD40 |
| pH_CV20 | pH coefficient of variation for the 20 previous days |  | - | pH_CV5, pH_CV10, pH_CV40, pH_SD5, pH_SD10, pH_SD20, pH_SD40 |
| pH_CV40 | pH coefficient of variation for the 40 previous days |  | - | pH_CV10, pH_CV20, pH_SD10, pH_SD20, pH_SD40 |
| DO2 | Daily average dissolved oxygen concentration | mg/L | - | DO_Max5, DO_Min5, DO_Min10, DO_Min20 |
| DO_Max5 | Maximum dissolved oxygen concentration for the 5 previous days | mg/L | - | DO, DO_Max10, DO_Max20, DO_Max40 |
| DO_Max10 | Maximum dissolved oxygen concentration for the 10 previous days | mg/L | - | DO_Max5, DO_Max20, DO_Max40 |
| DO_Max20 | Maximum dissolved oxygen concentration for the 20 previous days | mg/L | - | DO_Max5, DO_Max10, DO_Max40 |
| DO_Max40 | Maximum dissolved oxygen concentration for the 40 previous days | mg/L | - | DO_Max5, DO_Max10, DO_Max20 |
| DO_Min5 | Minimum dissolved oxygen concentration for the 5 previous days | mg/L | - | DO, DO_Min10, DO_Min20, DO_Min40, DO_CV5, DO_CV10, DO_CV20 |
| DO_Min10 | Minimum dissolved oxygen concentration for the 10 previous days | mg/L | - | DO, DO_Min5, DO_Min20, DO_Min40, DO_CV5, DO_CV10, DO_CV20, DO_CV40 |
| DO_Min20 | Minimum dissolved oxygen concentration for the 20 previous days | mg/L | - | DO, DO_Min5, DO_Min10, DO_Min40, DO_CV5, DO_CV10, DO_CV20, DO_CV40 |
| DO_Min402 | Minimum dissolved oxygen concentration for the 40 previous days | mg/L | - | DO_Min5, DO_Min10, DO_Min20, DO_CV5, DO_CV10, DO_CV20, DO_CV40 |
| DO_SD5 | Dissolved oxygen concentration standard deviation for the 5 previous days | mg/L | - | DO_CV5, DO_SD10, DO_SD20 |
| DO_SD102 | Dissolved oxygen concentration standard deviation for the 10 previous days | mg/L | - | DO_CV5, DO_CV10, DO_CV20, DO_SD5, DO_SD20, DO_SD40 |
| DO_SD20 | Dissolved oxygen concentration standard deviation for the 20 previous days | mg/L | - | DO_CV5, DO_CV10, DO_CV20, DO_SD5, DO_SD10, DO_SD40 |
| DO_SD40 | Dissolved oxygen concentration standard deviation for the 40 previous days | mg/L | - | DO_CV40, DO_SD10, DO_SD20 |
| DO_CV5 | Dissolved oxygen concentration coefficient of variation for the 5 previous days | mg/L | - | DO_CV10, DO_CV20, DO_CV40, DO_SD5, DO_SD10, DO_SD20, DO_Min5, DO_Min10, DO_Min20, DO_Min40 |
| DO_CV10 | Dissolved oxygen concentration coefficient of variation for the 10 previous days | mg/L | - | DO_CV5, DO_CV20, DO_CV40, DO_SD10, DO_SD20, DO_Min5, DO_Min10, DO_Min20, DO_Min40 |
| DO_CV20 | Dissolved oxygen concentration coefficient of variation for the 20 previous days | mg/L | - | DO_CV5, DO_CV10, DO_CV40, DO_SD10, DO_SD20, DO_Min5, DO_Min10, DO_Min20, DO_Min40 |
| DO_CV40 | Dissolved oxygen concentration coefficient of variation for the 40 previous days | mg/L | - | DO_CV5, DO_CV10, DO_CV20, DO_SD40, DO_Min10, DO_Min20, DO_Min40 |

** 1 = Variables selected for spatial Random Forest model and Generalised Linear Model performed to identifyenvironmental factors that enhance salinisation ; 2 = Variables selected for temporal Generalised Linear Mixed-effect Model; - = Variables not considered in spatial or temporal analyses.
